# Supplementary material
Source: PubMed Central journal article supplement (PMC2821450)
Supplement: NIHMS172199-supplement-1_si_001.pdf [file NIHMS172199-supplement-1_si_001.pdf]

## Facilitation of NADH Electrooxidation at Treated Carbon Nanotubes

Marilyn Wooten and Waldemar Gorski\*

*Department of Chemistry, University of Texas at San Antonio, San Antonio, Texas 78249-0698*

E-mail: [waldemar.gorski@utsa.edu](mailto:waldemar.gorski@utsa.edu)

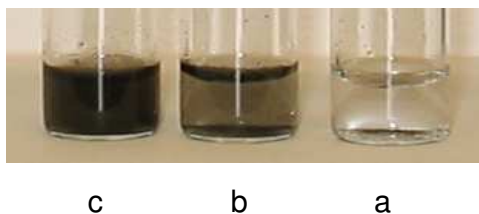

Fig. 1S. Suspensions of the original (a), water-boiled (b), and acid-microwaved (c) CNT in deionized water ( $0.2 \text{ mg mL}^{-1}$ ) after 3-min sonication and 5 h of standing.

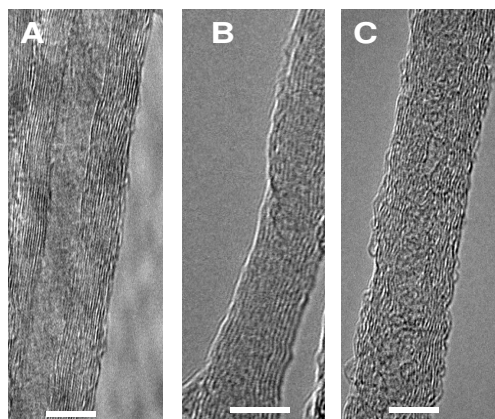

Fig. 2S. HRTEM images of the original (A), water-boiled (B), and acid-microwaved (C) CNT. The bars represent a distance of 5.0 nm.

### Recording of EELS Spectra

The EELS spectra were recorded in STEM mode with a 0.2-nm probe size to enlarge the number of counts in the detector. The convergence and collection semi-angles were 3

and 10 mrad, respectively. The EELS profiles were collected with a 0.10 eV per channel dispersion, and the typical full width at half maximum of the zero-loss peak was approximately 1.0 eV. The energy scale was calibrated based on the position of the zero-loss peak and the C 1s absorption peak, corresponding to 0 and 285.5 eV, respectively. A Fourier-log deconvolution process was performed in order to eliminate the zero-loss peak and scattering effects. For the C 1s core loss spectra, a background subtraction was carried out assuming a second order power law as the background model. EELS line scans were collected in a cross-sectional direction through individual CNT.
